# Supplementary material
Source: PubMed Central journal article supplement (PMC3358510)
Supplement: NIHMS355966-supplement-supplement_1.pdf [file NIHMS355966-supplement-supplement_1.pdf]

## **SUPPLEMENTARY ONLINE-ONLY MATERIAL**

eTable 1: Predictors of Severe HCV Disease in HIV-HCV Coinfected and HCV Monoinfected Liver Recipients

eTable 2: Predictors of First Treated Acute Rejection in HIV-HCV Coinfected and HCV Monoinfected Liver Recipients

Other Acknowledgements

**eTable 1: Predictors of Severe HCV Disease in HIV-HCV Coinfected and HCV Monoinfected Liver Recipients<sup>a</sup>**

| <b>Univariate Predictor</b>                     | <b>Hazard Ratio<br/>(95% CI)</b> | <b>P Value</b> |
|-------------------------------------------------|----------------------------------|----------------|
| HIV Coinfection                                 | 1.7 (0.9, 3.1)                   | 0.11           |
| Recipient Age                                   | 0.9 (0.9, 1.0)                   | 0.02           |
| Recipient Female Gender                         | 2.3 (1.0, 5.0)                   | 0.04           |
| Recipient Black Race                            | 1.1 (0.5, 2.7)                   | 0.80           |
| HCV Genotype 1/4/other                          | 2.7 (0.6, 12.2)                  | 0.21           |
| BMI at Enrollment < 21                          | 2.5 (0.5, 11.5)                  | 0.24           |
| Tacrolimus as Initial IS Med (vs. Cyclosporine) | 0.8 (0.3, 2.2)                   | 0.61           |
| Donor Risk Index (DRI)                          | 0.9 (0.4, 2.4)                   | 0.90           |
| Donor Age (by decade)                           | 0.9 (0.8, 1.1)                   | 0.42           |
| Anti-HCV Positive Donor                         | 1.3 (0.3, 5.3)                   | 0.76           |
| Treated Acute Rejection <sup>b</sup>            | 3.5 (1.5, 8.4)                   | 0.005          |

  

| <b>Multivariate Predictors</b>       | <b>Hazard Ratio<br/>(95% CI)</b> | <b>P Value</b> |
|--------------------------------------|----------------------------------|----------------|
| HIV Coinfection                      | 1.4 (0.7, 2.8)                   | 0.41           |
| Recipient Age                        | 0.9 (0.8, 1.0)                   | 0.046          |
| Recipient Female Gender              | 3.5 (1.4, 8.8)                   | 0.01           |
| Treated Acute Rejection <sup>b</sup> | 3.3 (1.3, 8.7)                   | 0.01           |

<sup>a</sup> Adjusted for clustering

<sup>b</sup> As time-varying covariate

**eTable 2: Predictors of First Treated Acute Rejection in HIV-HCV Coinfected and HCV Monoinfected Liver Recipients<sup>a</sup>**

| <b>Univariate Predictor</b>                     | <b>Hazard Ratio<br/>(95% CI)</b> | <b>P Value</b> |
|-------------------------------------------------|----------------------------------|----------------|
| HIV Coinfection                                 | 2.1 (1.2, 3.6)                   | 0.01           |
| Recipient Age                                   | 1.0 (0.9, 1.0)                   | 0.01           |
| Recipient Caucasian Race                        | 0.8 (0.5, 1.5)                   | 0.55           |
| BMI at Enrollment < 21                          | 1.5 (0.6, 4.2)                   | 0.40           |
| LT MELD Score > 25                              | 0.9 (0.5, 1.8)                   | 0.84           |
| Tacrolimus as Initial IS Med (vs. Cyclosporine) | 0.4 (0.2, 1.1)                   | 0.07           |
| Donor Risk Index (DRI)                          | 0.6 (0.3, 1.3)                   | 0.17           |

  

| <b>Multivariate Predictors</b> | <b>Hazard Ratio<br/>(95% CI)</b> | <b>P Value</b> |
|--------------------------------|----------------------------------|----------------|
| HIV Coinfection                | 2.1 (1.2, 3.6)                   | 0.01           |

<sup>a</sup> Adjusted for clustering

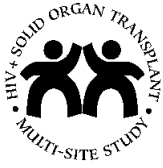

## Other Acknowledgements

We'd like to acknowledge the participating transplant centers, their study teams and their patients who participated in this research:

### **University of California, San Francisco**

PI: Peter Stock, M.D., Ph.D.  
Co-PI: Michelle Roland, M.D.  
George Beatty, M.D.  
Leslie Benet, M.D., Ph.D.  
Michael Berry, M.D.  
Laurie Carlson, RN, MSN  
Peter Chin-Hong, M.D.  
Linda Ferrell, M.D.  
Lynda Frassetto, M.D.  
Chris Freise, M.D.  
Annette Klemme, RN  
Jeffrey Martin, M.D.  
Jean Olson, M.D.  
Joel Palefsky, M.D.  
Rodney Rogers  
Norah Terrault, M.D.

### **Beth Israel Deaconess**

PI: Douglas Hanto, M.D., Ph.D.  
Co-PI: Michael Wong, M.D.  
Christin Rogers, Pharm.D.  
Michael Curry, M.D.  
Scott Johnson, M.D.  
Martha Pavlakis, M.D.  
Regina Ragasa, B.S.  
Louise Riemer, R.N., M.S.N., A.N.P.  
Julia Ringel, B.A.

### **Cedars Sinai Medical Center**

PI: Fred Poordad, M.D.  
Co-PI: Nicholas Nissen, M.D.  
David Hardy, M.D.  
Sandy Leong, R.N.  
Paul Vaca, M.B.A.

### **University of Cincinnati**

PI: Kenneth Sherman, M.D., Ph.D.  
Co-PI: Rita Alloway, Pharm.D.  
Mike Alonzo, M.D.  
Judith Feinberg, M.D.  
Gautham Mogilishetty, M.D.  
Steve Rudich, M.D.  
Steve Woodle, M.D.

**Cleveland Clinic**

PI: John Fung, M.D., Ph.D.  
David Barnes, M.D.  
Richard Fatica, M.D.  
Torrey Forrest  
David Goldfarb, M.D.  
Alan Taege, M.D.

**Columbia University**

PI: Lorna Dove, M.D.  
Co-PI: Jean Emond, M.D.  
Steve Lobritto, M.D.  
Natalie Neu, M.D.  
Stephanie Ringelstein  
Lori Rosenthal, D.N.P., D.C.C.  
Michael Yin, M.D.

**Drexel**

PI: Anil Kumar, M.D.  
Co-PI: Jeffrey Jacobson, M.D.  
Cynthia Gifford-Hollingsworth, M.S.N., C.R.N.P.  
Burckhardt Ringe, M.D.  
David Sass, M.D.  
Blair Weikert, M.D.

**Emory**

PI: Tom Pearson, M.D., D.Phil.  
Beth Begley, R.N., B.S.N.  
Antonio Guasch, M.D.  
Marshall Lyon, M.D.  
Sue Mead, RN

**Georgetown**

PI: Lynt Johnson, M.D.  
Anna Argyris, B.A.  
Charlotte Barbey-Morel, M.D.  
Susan Borgiasz, R.N., B.S.N.  
Joyce Gonin, M.D.  
Stuart Kaufman, M.D.  
Francisco Llach, M.D.  
Amy Lu, M.D.  
Renee Laughlin, B.S.N., M.P.H  
Dana Maglaris, B.A., M.A.  
Kevin McBryda, M.D.  
Joseph Melancon, M.D.  
Shea Mertens, B.A., M.A.  
Asha Moudgil, M.D.  
Vinod Rustigi, M.D.  
Kirti Shetty, M.D.  
Joseph Timpone, M.D.  
Mary Young, M.D.

**Johns Hopkins**

PI: Aruna Subramanian, M.D.  
Mohamed G. Atta, M.D.  
Andrew Cameron, M.D., Ph.D.  
Cynthia Cohen, D.N.P., C.R.N.P.  
Derek Fine, M.D.  
James Hamilton, M.D.  
Andrew Singer, M.D., Ph.D.

**Mt. Sinai School of Medicine**

PI: Barbara Murphy, M.D.  
Co-PI: Tom Schiano, M.D.  
Corinne Benchimol, M.D.  
Jonathan Bromberg, M.D.  
Doug Dieterich, M.D.  
Sander Florman, M.D.  
Shirish Huprikar, M.D.  
Mary Klotman, M.D.  
Michael Lief, M.D.  
Roberto Posada, M.D.  
Douglas Wilson, B.A.

**Northwestern University**

PI: Valentina Stosor, M.D.  
Co-PI: Richard Green, M.D.  
Jane Charette, R.N., B.S.N., CCRC  
Laura Coleman  
Lorenzo Gallon, M.D.

**Rush University**

PI: David Simon M.D., Ph.D.  
Forrest Dodson, M.D.  
Jan Fritsche, M.S., A.P.R.N.  
Stephen Jensik, M.D.  
Veronica Navarro, B.S., R.N.  
Samuel Saltzberg, M.D.  
David Vanthiel, M.D.

**Tulane University**

PI: Douglas Slakey, M.D.  
Becky Bazile, M.S., C.C.R.C.  
Sander Florman, M.D.  
Brandy Haydel  
Vidya Mave, M.D.  
David Mushatt, M.D.  
Fredric Regenstein, M.D.  
Margaret Silio, M.D.  
Susan Staulcup  
Rubin Zhang, M.D.

**University of Chicago**

PI: J. Michael Millis, M.D.  
Christopher Clardy, M.D.  
Barbara Hendrickson, M.D.  
Michelle Josephson, M.D.  
David Pitrak, M.D.  
Ken Pursell, M.D.  
Sara Rosenkoetter  
Helen Te, M.D.

**University of Maryland**

PI: Robert Redfield, M.D.  
Co-PI: Steve Bartlett, M.D.  
Charles Cangro, M.D.  
Charles Davis, M.D.  
William Mason

**University of Miami**

PI: Jorge Diego, M.D.  
PI: Andreas Tzakis, M.D., Ph.D.  
Co-PI: David Roth, M.D.  
George Burke, M.D.  
Lois Hanson, R.N.  
Dushyantha Jayaweera, M.D.  
Eugene Schiff, M.D.  
Panagiotis Tryphonopoulos, M.D., M.B.A.  
Debbie Wepler, R.N., M.S.N.

**University of Pennsylvania**

PI: Kim Olthoff, M.D.  
Co-PI: Emily Blumberg, M.D.  
Brenda Apollo, PA-C, M.H.S.  
Roy Bloom, M.D.  
Maryann Najdzinowicz, R.N., B.S.N.  
Rajender Reddy, M.D.

**University of Pittsburgh**

PI: Margaret Ragni, M.D., MPH  
Co-PI: Ron Shapiro, M.D.  
Michael de Vera, M.D.  
Laurie Hope, RN  
Charles Rinaldo, Ph.D.  
Obaid Shakil, M.D.

**University of Virginia**

PI: Kenneth Brayman, M.D., Ph.D.  
Carl Berg, M.D.  
Amy Fansler  
Peter Lobo, M.D.  
Julie Straub  
Brian Wispelway, M.D.

**Washington Hospital Center**

PI: Jimmy Light, M.D.  
Jack Moore, M.D.  
Shmuel Shoham, M.D.  
Marvin Tucker  
Michael Orquiza, MD

**The EMMES Corporation**

Don Stablein, Ph.D.  
Burc Barin, M.S.  
Roe Wright

**National Institutes of Health**

Lawrence Fox, M.D., Ph.D.  
Jonah Odum, M.D., Ph.D.  
Daniella Livnat, Ph.D.  
Helena Diop
